# Supplementary material for: Comparison of Chitosan Nanoparticles and Soluplus Micelles to Optimize the Bioactivity of Posidonia oceanica Extract on Human Neuroblastoma Cell Migration
Source: Pharmaceutics. 2019 Dec 6;11(12):655. doi: 10.3390/pharmaceutics11120655 (PMC6955792; doi:10.3390/pharmaceutics11120655)

# Supplementary Materials: Comparison of Chitosan Nanoparticles and Soluplus Micelles to Optimize the Bioactivity of *Posidonia oceanica* Extract on Human Neuroblastoma Cell Migration

Vieri Piazzini, Marzia Vasarri, Donatella Degl'Innocenti, Asia Guastini, Emanuela Barletta, Maria Cristina Salvatici, and Maria Camilla Bergonzi

**Table S1.** Total polyphenols and carbohydrates content in POE and its antioxidant and radical scavenging activities. All values (means  $\pm$  standard deviations,  $n = 3$ ) are expressed in mg/mL of the extract after EtOH/H<sub>2</sub>O (70:30 *v/v*) resuspension [6–8].

|                   | Polyphenols     | Carbohydrates        | Antioxidant   | Radical Scavenging |
|-------------------|-----------------|----------------------|---------------|--------------------|
| Method            | Folin-Ciocalteu | Phenol/Sulfuric acid | Ferrozine®    | DPPH               |
| Reference control | Gallic acid     | Glucose              | Ascorbic acid | Ascorbic acid      |
| POE               | 3.6 $\pm$ 0.3   | 7.0 $\pm$ 2          | 0.9 $\pm$ 0.2 | 11.0 $\pm$ 0.7     |

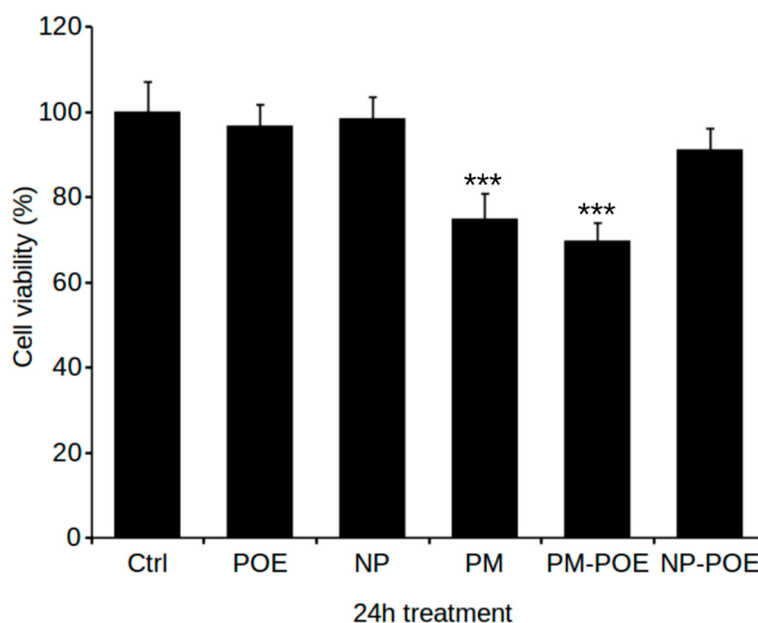

**Figure S1.** SH-SY5Y cell viability. MTT test on cells untreated (control, Ctrl), treated with POE, PM-POE and NP-POE or with vehicles only (PM and NP) for 24 h. Data were reported as mean  $\pm$  standard error. \*\*\*:  $p$ -value  $< 0.001$  vs. the untreated control cells. Tukey's test, ( $n = 3$ ).

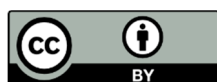

Supplement: Supplementary file 1 [file pharmaceutics-11-00655-s001.pdf]
